# Supplementary material
Source: PubMed Central journal article supplement (PMC2841878)
Supplement: 1001064107_pnas.201001064SI.pdf [file 1001064107_pnas.201001064SI.pdf]

# Supporting Information

Dail et al. 10.1073/pnas.1001064107

## SI Materials and Methods

**Shotgun Cloning.** Genomic DNA was digested with MseI or NlaIII, followed by ligation of linkers. MseI+ 5'-GTAATACGACTCACTA TAGGGCTCCGCTTAAGGGAC-3' and MseI- 5'-Phos-TAGTC CCTTAAGCGGAG-C3spacer-3'. NlaIII+ 5'-GTAATACGACT CACTATAGGGCTCCGCTTAAGGGACCATG-3' and NlaIII- 5'-Phos-GTCCCTTAAGCGGAG-C3spacer-3'. Fragments were digested with EcoRV to remove distal linker. MOL4070LTR junction fragments were amplified with primers to the LTR and linker using 5'-GCTAGCTTGCCAAACCTACAGGTGG-3' and 5'-GTAATACGACTCACTATAGGGCTCCG-3'. Fragments were further amplified using nested primers 5'-CCAAACCTA CAGGTGGGGTCTTTC-3' and 5'-AGGGCTCCGCTTAAGG GAC-3'. The PCR products were cloned into Zero Blunt Cloning Kit (Invitrogen), and 96 clones were sequenced per enzyme (192 total per T-ALL). Sequencing was performed by Functional Biosciences.

**Retroviral Transduction and Adoptive Transfer.** Bone marrow from 6-week-old *Mx1-Cre*, *Kras<sup>G12D</sup>* and wild-type littermate mice were retrovirally transduced as described previously (1) with Murine Stem Cell Virus (MSCV) bicitronic retroviral vector expressing Ik6 (*IKZF1* lacking coding exons 3–6) cloned from a patient with BCR-ABL1 acute lymphoblastic leukemia, and GFP graciously provided by Charles Mullighan. Recipient mice were irradiated with 950 cGy and retroorbitally injected with transduced bone marrow cells and  $5 \times 10^5$  Sca-1 depleted normal helper bone marrow cells. Three weeks after transplantation, recipient mice were injected with polyinosinic-polycytidilic acid to induce expression of *Kras<sup>G12D</sup>*.

**Western Blot Analysis.** Cells were lysed in 1% Nonidet P-40 buffer containing 30 mM NaF, 30 mM  $\beta$ -glycerophosphate, 20 mM Na<sub>4</sub>P<sub>2</sub>O<sub>7</sub>, 1 mM Na<sub>3</sub>VO<sub>4</sub>, and Complete (Roche). Antibodies included anti-Pan-Ras (Ab-3) (Calbiochem), anti-phospho-ERK1/2 (Thr202/Tyr204), anti- $\beta$ -actin, anti-PTEN, anti-cleaved Notch1 (Val1744), anti-phospho-s6 (Ser2352/Ser236) (Cell Signaling Technology), anti-

pAkt (Ser473) (Invitrogen), and anti-Ikaros (H-100) (Santa Cruz Biotechnology). Nuclear extracts were isolated using an NE-PER kit (Pierce), and the Ras-GTP pulldown assay with GST-Raf1 RBD beads (Upstate) was performed according to the manufacturer's instructions.

**Notch1 Mutation Analysis.** Genomic DNA was amplified using 5'-ATAGCATGATGGGGCCACTA-3' and 5'-GCCTCTGGAA TGTGGGTGAT-3'. Taqman assays were designed to preferentially amplify each of the mutations. Three primers were used for each mutation: (i) wild-type specific primer, (ii) mutant-specific primer, and (iii) primer that amplifies both wild-type and mutant samples (available upon request). Reactions were performed using 1 $\times$  Taqman Universal PCR Master Mix (ABI), 250 nM Notch PEST domain probe, 900 nM of each primer, and 100 ng of DNA in a final volume of 20  $\mu$ L. Reactions were run in triplicates on an ABI 7900HT under the following conditions: 90  $^{\circ}$ C for 10 min, then 40 cycles of 90  $^{\circ}$ C for 15 s and 60  $^{\circ}$ C for 1 min.

**Quantitative RT-PCR.** Taqman assays were used to quantify the transcriptional levels of Notch1 target genes. Reactions were performed with 1 $\times$  SYBR Green (Applied Biosystems), 500 nM of each primer, and varying concentrations of cDNA. Reactions were run in triplicates on an ABI 7900HT under the following conditions: 95  $^{\circ}$ C for 10 min and then 40 cycles of 95  $^{\circ}$ C for 15 s and 60  $^{\circ}$ C for 1 min.

The following primers were used:

*GapDH* forward: TGTGTCCGTCGTGGATCTGA  
*GapDH* reverse: CCTGCTTCACCACCTTCTTGA  
*Hes1* forward: AAAGTCATCAAAGCCTATCATGGAG  
*Hes1* reverse: GCCGGGAGCTATCTTCTTAAG  
*Deltex1* forward: ATCAGTTCCGGCAAGACACAG  
*Deltex1* reverse: CGATGAGAGGTTCGAGCCAC

1. Schubbert S, et al. (2005) Functional analysis of leukemia-associated PTPN11 mutations in primary hematopoietic cells. *Blood* 106:311–317.









**Table S1. Common insertion sites identified in *Kras*<sup>WT</sup> and *Kras*<sup>G12D</sup> T-ALLs**

| Gene           | T-ALL | Genotype                    | Location  | Effect          | Direction | Address*  | Frequency |
|----------------|-------|-----------------------------|-----------|-----------------|-----------|-----------|-----------|
| <i>Ikzf1</i>   | 3     | <i>Kras</i> <sup>G12D</sup> | Intron 3  | Disrupt CDS     | Inv       | 11640820  | 9         |
| <i>Ikzf1</i>   | 3     | <i>Kras</i> <sup>G12D</sup> | Intron 1  | Not disrupt CDS | Inv       | 11588821  | 45        |
| <i>Ikzf1</i>   | 5     | <i>Kras</i> <sup>G12D</sup> | Intron 3  | Disrupt CDS     | Inv       | 11626720  | 1         |
| <i>Ikzf1</i>   | 5     | <i>Kras</i> <sup>G12D</sup> | Intron 3  | Disrupt CDS     | Inv       | 11612305  | 1         |
| <i>Ikzf1</i>   | 7     | <i>Kras</i> <sup>G12D</sup> | Intron 3  | Disrupt CDS     | Same      | 11614435  | 10        |
| <i>Ikzf1</i>   | 15    | <i>Kras</i> <sup>G12D</sup> | Intron 3  | Disrupt CDS     | Same      | 11615515  | 2         |
| <i>Ikzf1</i>   | 15    | <i>Kras</i> <sup>G12D</sup> | Intron 3  | Disrupt CDS     | Inv       | 11615251  | 104       |
| <i>Ikzf1</i>   | 15    | <i>Kras</i> <sup>G12D</sup> | Intron 3  | Disrupt CDS     | Inv       | 11615248  | 1         |
| <i>Ikzf1</i>   | 25    | <i>Kras</i> <sup>G12D</sup> | Intron 3  | Disrupt CDS     | Inv       | 11622678  | 16        |
| <i>Ikzf1</i>   | 26    | <i>Kras</i> <sup>G12D</sup> | Intron 3  | Disrupt CDS     | Inv       | 11618019  | 3         |
| <i>Ikzf1</i>   | 26    | <i>Kras</i> <sup>G12D</sup> | Intron 1  | Not disrupt CDS | Inv       | 11591855  | 5         |
| <i>Ikzf1</i>   | 29    | <i>Kras</i> <sup>G12D</sup> | Intron 3  | Disrupt CDS     | Inv       | 11615831  | 1         |
| <i>Ikzf1</i>   | 32    | <i>Kras</i> <sup>G12D</sup> | Intron 3  | Disrupt CDS     | Inv       | 11624649  | 7         |
| <i>Ikzf1</i>   | 32    | <i>Kras</i> <sup>G12D</sup> | Intron 3  | Disrupt CDS     | Same      | 11620497  | 1         |
| <i>Ikzf1</i>   | 32    | <i>Kras</i> <sup>G12D</sup> | Intron 3  | Disrupt CDS     | Inv       | 11614950  | 2         |
| <i>Ikzf1</i>   | 32    | <i>Kras</i> <sup>G12D</sup> | Intron 3  | Disrupt CDS     | Same      | 11610649  | 2         |
| <i>Ikzf1</i>   | 42    | <i>Kras</i> <sup>G12D</sup> | Intron 1  | Not disrupt CDS | Inv       | 11591205  | 15        |
| <i>Ikzf1</i>   | 42    | <i>Kras</i> <sup>G12D</sup> | Intron 1  | Not disrupt CDS | Inv       | 11590911  | 2         |
| <i>Ikzf1</i>   | 49    | <i>Kras</i> <sup>G12D</sup> | Intron 3  | Disrupt CDS     | Same      | 11625202  | 13        |
| <i>Ikzf1</i>   | 49    | <i>Kras</i> <sup>G12D</sup> | Intron 1  | Not disrupt CDS | Same      | 11594250  | 5         |
| <i>Ikzf1</i>   | 49    | <i>Kras</i> <sup>G12D</sup> | Intron 1  | Not disrupt CDS | Inv       | 11591856  | 1         |
| <i>Ahi1</i>    | C7    | WT                          | Intron 19 | Disrupt CDS     | Same      | 20738849  | 5         |
| <i>Ahi1</i>    | 6     | <i>Kras</i> <sup>G12D</sup> | Intron 15 | Disrupt CDS     | Inv       | 20684543  | 10        |
| <i>Ahi1</i>    | 28    | <i>Kras</i> <sup>G12D</sup> | 3'        | 4.189 kb        | Same      | 20774033  | 1         |
| <i>Ahi1</i>    | 42    | <i>Kras</i> <sup>G12D</sup> | Intron 21 | Disrupt CDS     | Same      | 20759403  | 5         |
| <i>Rasgrp1</i> | C3    | WT                          | Intron 1  | Disrupt CDS     | Same      | 117033870 | 19        |
| <i>Rasgrp1</i> | C4    | WT                          | 5'        | 64.569 kb       | Same      | 117098887 | 4         |
| <i>Rasgrp1</i> | C7    | WT                          | 5'        | 58.846 kb       | Same      | 117093164 | 15        |
| <i>Lmo2</i>    | C7    | WT                          | 5'        | 67.398 kb       | Inv       | 103703663 | 1         |
| <i>Lmo2</i>    | C7    | WT                          | 5'        | 35.014 kb       | Same      | 103736047 | 10        |
| <i>Lmo2</i>    | 3     | <i>Kras</i> <sup>G12D</sup> | 5'        | 67.399 kb       | Inv       | 103703662 | 5         |

T-ALL, T lineage acute lymphoblastic leukemia; Inv, inverse orientation; CDS, coding sequence.

\*Refers to the reference genome (University of California, San Francisco mouse genome assembly mm8; February 2006).

**Table S2. Notch1 mutations in *Kras*<sup>G12D</sup> and *Kras*<sup>WT</sup> T-ALLs**

| T-ALL | Genotype                    | Mutation                                          |
|-------|-----------------------------|---------------------------------------------------|
| 1     | <i>Kras</i> <sup>G12D</sup> | c.7161_7162delGinsTTTCT                           |
| 2     | <i>Kras</i> <sup>G12D</sup> | c.7160_7163delCGGinsGAGGT                         |
| 3     | <i>Kras</i> <sup>G12D</sup> | c.7162_7163insG                                   |
| 5     | <i>Kras</i> <sup>G12D</sup> | c.7161_7162delGinsTACAGGAACCACCC; c.7272insAAGAGG |
| 6     | <i>Kras</i> <sup>G12D</sup> | c.7160_7161insACCCC                               |
| 7     | <i>Kras</i> <sup>G12D</sup> | c.7271_7272delTCinsGTGAGGG                        |
| 9     | <i>Kras</i> <sup>G12D</sup> | c.7148_7170delCTGCCCCAACACCGCTGGCAAC              |
| 12    | <i>Kras</i> <sup>G12D</sup> | c.7354_7356delTCTinsGG                            |
| 14    | <i>Kras</i> <sup>G12D</sup> | c.7337_7338insC                                   |
| 15    | <i>Kras</i> <sup>G12D</sup> | c.7273_7274delGinsAAAAC                           |
| 16    | <i>Kras</i> <sup>G12D</sup> | c.7158_7159insG                                   |
| 18    | <i>Kras</i> <sup>G12D</sup> | c.7300_7301insGAGGGAGC                            |
| 20    | <i>Kras</i> <sup>G12D</sup> | c.7161_7162delGinsCTTC                            |
| 22    | <i>Kras</i> <sup>G12D</sup> | c.7273_7274delGinsCCC                             |
| 23    | <i>Kras</i> <sup>G12D</sup> | c.7161_7162delGinsCC                              |
| 24    | <i>Kras</i> <sup>G12D</sup> | c.7164_7165insAGTAGTT                             |
| 25    | <i>Kras</i> <sup>G12D</sup> | c.7162_7163insGTAGCATTG                           |
| 26    | <i>Kras</i> <sup>G12D</sup> | c.7297_7298insGTTCTGG                             |
| 27    | <i>Kras</i> <sup>G12D</sup> | c.7408_7409delGC                                  |
| 28    | <i>Kras</i> <sup>G12D</sup> | c.7161_7162delGinsCTTC                            |
| 29    | <i>Kras</i> <sup>G12D</sup> | c.7328_7335delGATGTACA                            |
| 32    | <i>Kras</i> <sup>G12D</sup> | c.7161_7162delGinsCT                              |
| 34    | <i>Kras</i> <sup>G12D</sup> | c.7161delinsCCCC                                  |
| 35    | <i>Kras</i> <sup>G12D</sup> | c.7161_7162insCC                                  |
| 36    | <i>Kras</i> <sup>G12D</sup> | Frameshift before PEST domain                     |
| 37    | <i>Kras</i> <sup>G12D</sup> | c.7161_7162insC                                   |
| 40    | <i>Kras</i> <sup>G12D</sup> | c.7161_7162insCCCCCCC                             |
| 42    | <i>Kras</i> <sup>G12D</sup> | c.7161_7162delGinsCC; c.7306_7307delAG            |
| 43    | <i>Kras</i> <sup>G12D</sup> | Frameshift before PEST domain                     |
| 50    | <i>Kras</i> <sup>G12D</sup> | c.7161_7162delGinsTT                              |
| C3    | WT                          | 7162_3insG                                        |
| C2    | WT                          | 7272_7274delGinsAGAAAAA                           |
| C12   | WT                          | 7272_3delGinsGAGGC                                |

T-ALL, T lineage acute lymphoblastic leukemia.
